# Supplementary material for: An incisive optical recognition of monohydrogen phosphate by a fluorescein-based chemodosimeter
Source: Royal Society of Chemistry journal article supplement (doi:10.1039/c9nj03023a), 2020-01-01
Supplement: c9nj03023a1.pdf [file c9nj03023a1.pdf]

## **An incisive optical recognition of monohydrogen phosphate by a fluorescein based chemodosimeter**

Sharad Kumar Asthana,<sup>a</sup> Abha Pandey,<sup>a</sup> Ajit Kumar,<sup>b</sup> and K. K. Upadhyay<sup>a\*</sup>

<sup>a</sup>*Department of Chemistry, Institute of Science, Banaras Hindu University, Varanasi, Uttar Pradesh, India-221005,*

<sup>b</sup>*Department of Applied Sciences & Humanities, National Institute of Foundry & Forge Technology, Ranchi-834003, Jharkhand, India*

*\*Corresponding author: Tel: +91 542 670 2488*

*E-mail: drkaushalbhu@yahoo.co.in; kku@bhu.ac.in, Tel: +91-542-6702488*

---

## **EXPERIMENTAL**

### **1.1 Apparatus:**

The IR Spectra for the receptor **FLH** was recorded on JASCO-FTIR Spectrophotometer while <sup>1</sup>H NMR and <sup>13</sup>C NMR spectra for the same were recorded on a JEOL AL 300 FT NMR Spectrometer. Mass spectrometric analysis was carried out on a MDS Sciex API 2000 LCMS/Bruker Compass data analysis spectrometer. Electronic spectra were recorded at room temperature (298 K) on a UV-1700 pharماسpec spectrophotometer with quartz cuvette (path length= 1.0cm). Emission spectra were recorded on JY HORIBA Fluorescence spectrophotometer.

### **1.2 Materials:**

All reagents for synthesis were purchased from Sigma-Aldrich and were used without further purification.

### **1.3 General Methods:**

All titration experiments were carried at room temperature. All the anions were used as their TBA salts. The <sup>1</sup>H NMR spectra were recorded by using tetramethylsilane (TMS) as an internal reference standard. For the <sup>1</sup>H NMR titration spectra of **FLH**, 5×10<sup>-3</sup>M solutions were prepared in DMSO-*d*<sub>6</sub> while the stock solution of HPO<sub>4</sub><sup>2-</sup> was prepared in DMSO-*d*<sub>6</sub>. For UV-visible/fluorescence titration experiments, the solutions of cations were prepared in aqueous medium. Chloride salt of metal ions was used for solution preparation. Due to insufficient solubility of **FLH** in water, its stock solution of 0.25 M was prepared in DMSO which was used for fluorescence titration experiment in EtOH: water (3: 2, v/v) at 1.0μM concentration through dilution.

### **1.4. Materials and Instrumentation**

All solvents and reagents (analytical and spectroscopic grade) were obtained from Sigma-Aldrich and were used as received. Solutions of various anions were prepared as their TBA salts.

The chemical shifts ( $\delta$ ) are reported in ppm, relative to tetramethylsilane [ $\text{Si}(\text{CH}_3)_4$ ]. The UV-vis. absorption spectra were recorded at 25°C using a UV-1700 pharmaspec spectrophotometer. Emission spectra were recorded on Varian Cary Eclipse Fluorescence spectrophotometer and JY HORIBA Fluorescence spectrophotometer. The IR Spectra were recorded on JASCO-FTIR Spectrophotometer while  $^1\text{H}$  NMR spectra were recorded on JEOL AL 300 FT NMR Spectrometer. Mass spectrometric analysis was carried out on a MDS Sciex API 2000 LCMS spectrometer.

### Synthesis of Receptor FLH

To the mixture of fluorescein (0.15g, 0.45mmol) and triethylamine (0.2mL) in 15 mL anhydrous dichloromethane ( $\text{CH}_2\text{Cl}_2$ ) at 0°C; methylchloroacetate (0.5 mL, in 5 mL of  $\text{CH}_2\text{Cl}_2$ ) was added drop wise with constant stirring over the time period of 30 min. The reaction mixture was warmed at room temperature and was further stirred overnight (**Scheme 1**). The solution was diluted with  $\text{CH}_2\text{Cl}_2$  (30 mL), washed with brine (30 mL  $\times$  2), and then dried over anhydrous  $\text{Na}_2\text{SO}_4$ . The solvent was removed in vacuum to obtain a crude solid mixture. Finally, the target compound **FLH** was isolated as a yellow solid (70% yield) by silica chromatography eluting with  $\text{CH}_2\text{Cl}_2$ . The purity of **FLH** was checked by thin layer chromatography (TLC). The probe **FLH** was fully characterized by  $^1\text{H}$  &  $^{13}\text{C}$  NMR, IR along with ESI-MS spectrometry (**ESI; Figure 1 to 4**).

**Spectroscopic characterization data of FLH:** Yield: 64%; **IR/cm<sup>-1</sup>:** 3401, 3102, 2924, 2854, 1538, 1523, 1766, 1435, 1364, 1109, 1090, 925, 820;  **$^1\text{H}$  NMR (300 MHz, DMSO-*d*<sub>6</sub>, TMS):**  $\delta$  = 8.97 (d, 1H, ArH), 7.8-7.7 (m, 1H, ArH), 7.44 (d, 2H, ArH), 7.07, 6.96 (d,d 3H, ArH), 3.87 (s, 3H,  $\text{CH}_3^-$ );  **$^{13}\text{C}$  NMR (75 MHz, DMSO-*d*<sub>6</sub>, TMS):**  $\delta$  =172.40, 169.29, 166.21, 156.53, 154.66, 151.29, 150.72, 129.25, 125.33, 124.96, 123.92, 117.91, 116.93, 110.09, 102.21, 80.62; **ESI-MS:** m/z Calculated for  $\text{C}_{26}\text{H}_{15}\text{NO}_9\text{S}$  [M] = 504, Found [M+1] = 505.2.

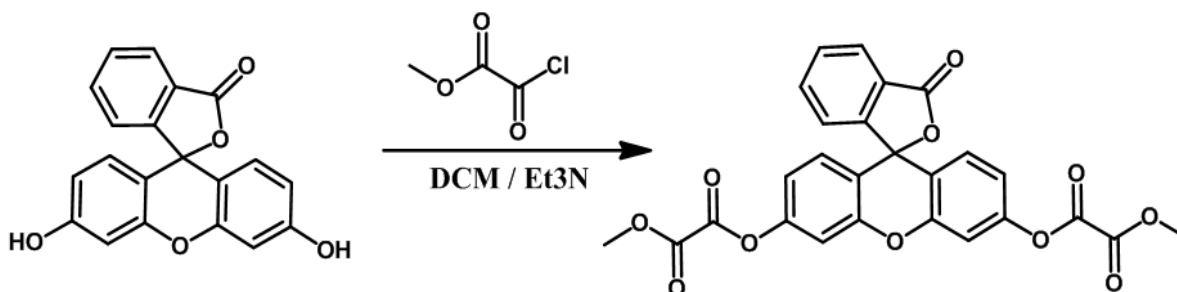

**Scheme 1.** Synthesis of receptor **FLH**.

## Synthesis of FLHP

Mono basic phosphate adduct of **FLH** i.e. **FLHP** was synthesized by adding 3 mL aqueous solution of  $\text{HPO}_4^{2-}$  (1.5 mmol) slowly to a magnetically stirred 10 mL ethanol: water (3:2, v/v) solution of **FLH** (0.5 mmol) (**Scheme 2**). The mixture was further stirred at room temperature for ~2 hours where by a yellowish precipitate was formed. The same was filtered and washed several times with diethyl ether and finally dried under vacuum over anhydrous  $\text{CaCl}_2$ . The probe **FLHP** was fully characterized by  $^1\text{H}$  &  $^{13}\text{C}$  NMR, IR along with ESI-MS spectrometry (**ESI; Figure 5 to 8**).

**Spectroscopic characterization data of complex FLHP:** Yield: 40%; **IR**/ $\text{cm}^{-1}$ : 3427, 2963, 2876, 2169, 1707, 1634, 1575, 1523, 1486, 1468, 1421, 1387, 1345, 1226, 1209, 1167, 1105, 1033, 882, 740;  **$^1\text{H}$  NMR:** (300 MHz,  $\text{DMSO-}d_6$ , TMS):  $\delta$  = 10.12 (s, 1H), 8.12 (d, 1H, Ar), 8.02-7.98 (m, 3H, Ar), 7.82-7.74 (m, 2H, Ar), 7.71 (s, 1H, Ar), 7.38-6.51 (m, 3H, Ar), 3.91 (s, 3H,  $\text{OCH}_3$ );  **$^{13}\text{C}$  NMR** (75 MHz,  $\text{DMSO-}d_6$ , TMS):  $\delta$  = 211.68, 168.29, 159.67, 156.50, 154.68, 152.06, 151.44, 151.20, 150.76, 135.46, 130.38, 130.04, 129.11, 128.76, 128.08, 125.83, 124.59, 123.87, 100.00, 109.83, 109.43, 105.24, 51.90; **ESI-MS:** m/z Calculated for  $\text{C}_{20}\text{H}_{11}\text{NaO}_5$  [M] = 354 found [M-1] = 353.1.

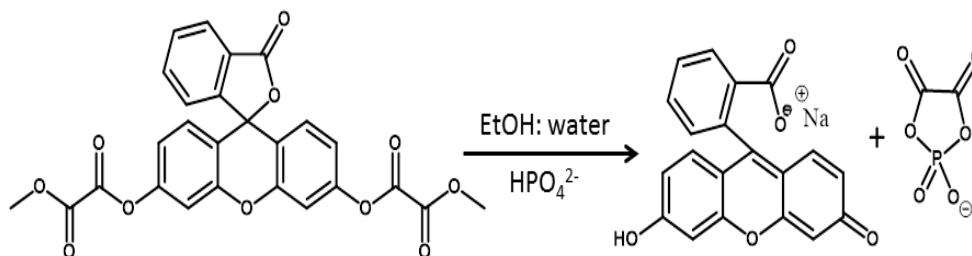

**Scheme 2.** Synthesis of **FLHP**.

**Figure and Captions**

| S. No. | Figures    | Captions                                                                                                                                                                                                                                                                                                      | Page No. |
|--------|------------|---------------------------------------------------------------------------------------------------------------------------------------------------------------------------------------------------------------------------------------------------------------------------------------------------------------|----------|
| 1.     | Figure S1  | $^1\text{H}$ NMR spectrum of <b>FLH</b> (in $\text{DMSO}-d_6$ ).                                                                                                                                                                                                                                              | 5        |
| 2.     | Figure S2  | $^{13}\text{C}$ NMR spectrum of <b>FLH</b> (in $\text{DMSO}-d_6$ ).                                                                                                                                                                                                                                           | 6        |
| 3.     | Figure S3  | IR spectrum of <b>FLH</b> .                                                                                                                                                                                                                                                                                   | 7        |
| 4.     | Figure S4  | Mass spectrum of <b>FLH</b> .                                                                                                                                                                                                                                                                                 | 8        |
| 5.     | Figure S5  | $^1\text{H}$ NMR spectrum of <b>FLH</b> + $\text{HPO}_4^{2-}$ Complex (in $\text{DMSO}-d_6$ ).                                                                                                                                                                                                                | 9        |
| 6.     | Figure S6  | $^{13}\text{C}$ NMR spectrum of <b>FLH</b> + $\text{HPO}_4^{2-}$ Complex (in $\text{DMSO}-d_6$ ).                                                                                                                                                                                                             | 10       |
| 7.     | Figure S7  | IR spectrum of <b>FLH</b> + $\text{HPO}_4^{2-}$ Complex.                                                                                                                                                                                                                                                      | 11       |
| 8.     | Figure S8  | Mass spectrum of <b>FLH</b> + $\text{HPO}_4^{2-}$ Complex.                                                                                                                                                                                                                                                    | 12       |
| 9.     | Figure S9  | UV-visible spectra of <b>FLH</b> with different anions at $10\mu\text{M}$ in EtOH: water (3: 2, v/v) medium.                                                                                                                                                                                                  | 13       |
| 10.    | Figure S10 | Bar graph representation of Absorption spectrum for competition study; [ <b>yellow bars</b> ] showing response <b>FLH</b> in presence of various anions, [ <b>blue bars</b> ] showing response of <b>FLH</b> in presence of $\text{HPO}_4^{2-}$ and $\text{HPO}_4^{2-}$ followed by various competing anions. | 14       |
| 11.    | Figure S11 | Naked-eye images of <b>FLH</b> in the presence of $\text{HPO}_4^{2-}$ and various anions (under visible light).                                                                                                                                                                                               | 15       |
| 12.    | Figure S12 | Naked eye fluorescence images of <b>FLH</b> ( $1.0\ \mu\text{M}$ ) in the presence of $\text{HPO}_4^{2-}$ and various anions (10 equiv.).                                                                                                                                                                     | 16       |
| 13.    | Figure S13 | Fluorescence spectra of receptor <b>FLH</b> ( $1.0\ \mu\text{M}$ ) upon addition of different anions.                                                                                                                                                                                                         | 17       |
| 14.    | Figure S14 | Bar graph representation of Emission spectrum for competition study; [ <b>green bars</b> ] showing response <b>FLH</b> in presence of various anions, [ <b>red bars</b> ] showing response of <b>FLH</b> in presence of $\text{HPO}_4^{2-}$ and $\text{HPO}_4^{2-}$ followed by various competing anions.     | 18       |
| 15.    | Figure S15 | Calibration curve for determination of detection limit of <b>FLH</b> for $\text{HPO}_4^{2-}$ by using absorption titration data (494 nm).                                                                                                                                                                     | 19       |
| 16.    | Figure S16 | Calibration curve for determination of detection limit of <b>FLH</b> for $\text{HPO}_4^{2-}$ by using emission titration data (526 nm).                                                                                                                                                                       | 20       |
| 17.    | Figure S17 | Fluorescence spectra of receptor <b>FLH</b> ( $1.0\mu\text{M}$ ) upon addition of different anions and corresponding fluorescence images                                                                                                                                                                      | 21       |
| 18.    | Figure S18 | Reaction time profile of <b>FLH</b> with $\text{HPO}_4^{2-}$ by (a) Through UV-visible spectra ( $\lambda_{\text{abs}}$ at 495 nm) and (b) Fluorescence spectra $\lambda_{\text{em}}$ at 530 nm.                                                                                                              | 22       |
| 19.    | Figure S19 | The variation in fluorescence intensity in <b>FLH</b> with the change in pH in the presence of $\text{HPO}_4^{2-}$                                                                                                                                                                                            | 23       |
| 20.    | Table S1   | Crystal data of <b>FLHP</b> .                                                                                                                                                                                                                                                                                 | 24       |

**Figure S1:**  $^1\text{H}$  NMR spectrum of **FLH** (in  $\text{DMSO}-d_6$ ):

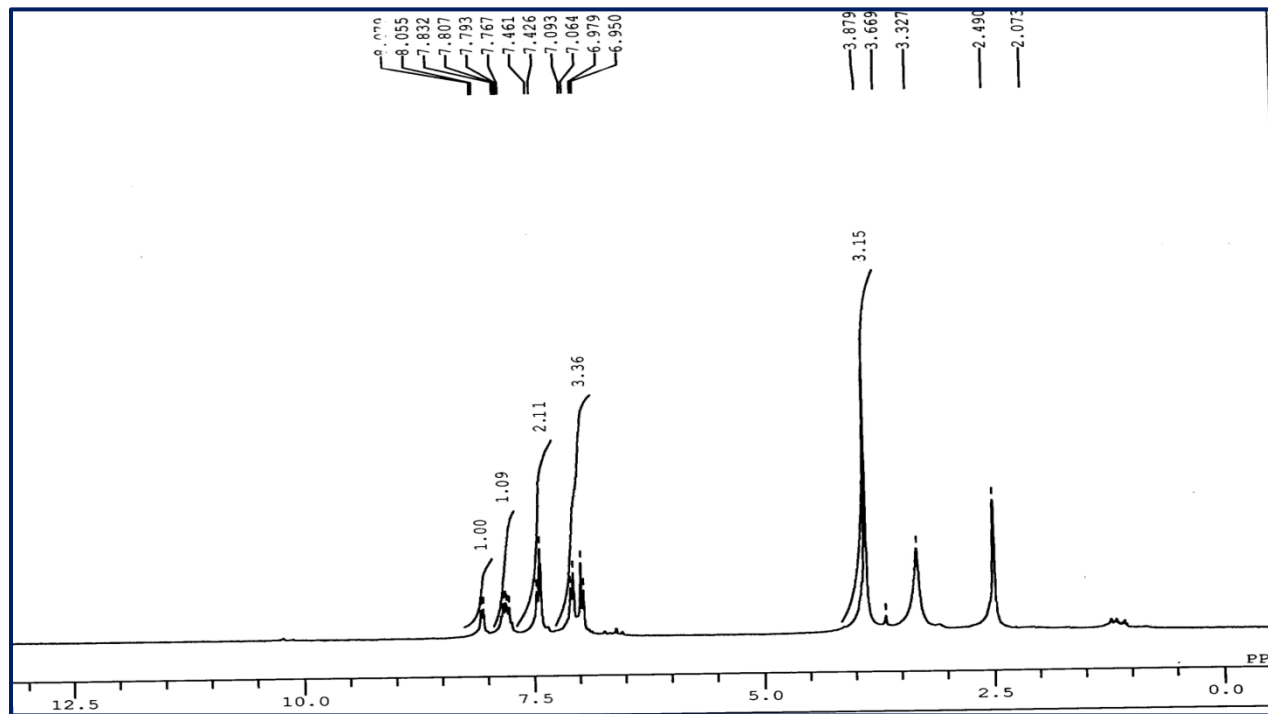

**Figure S2:**  $^{13}\text{C}$  NMR spectrum of **FLH** (in  $\text{DMSO-}d_6$ ):

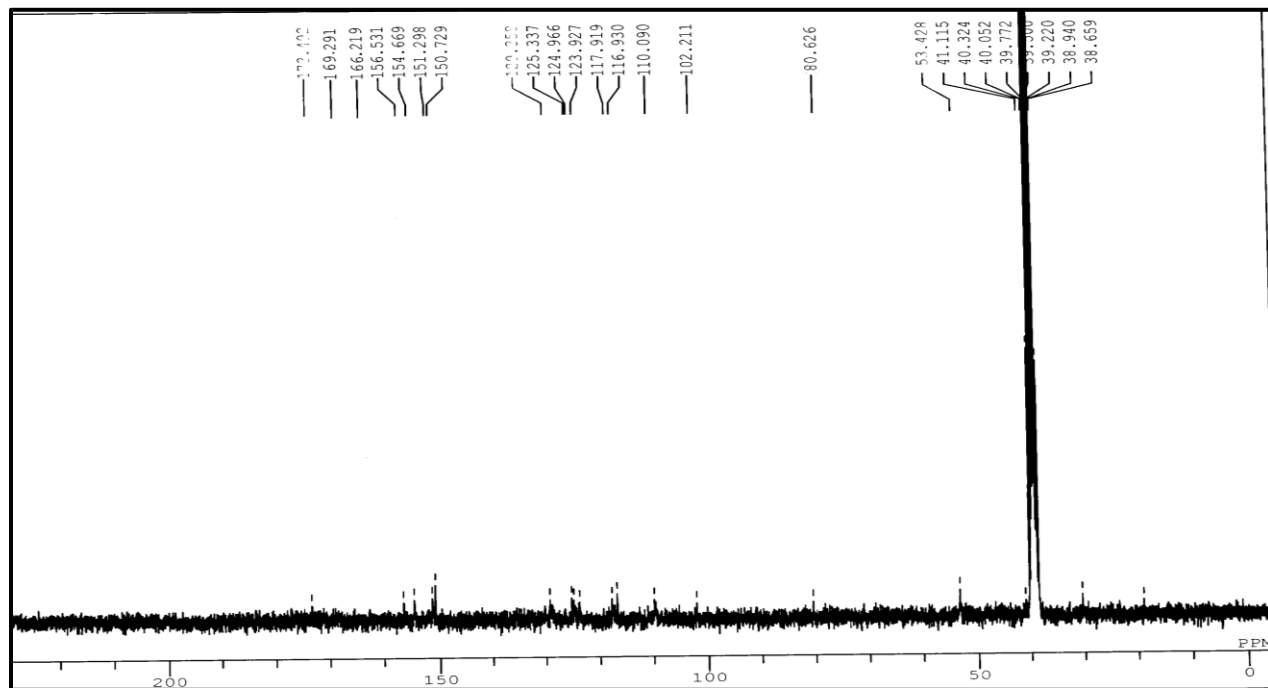

Figure S3: IR spectrum of FLH:

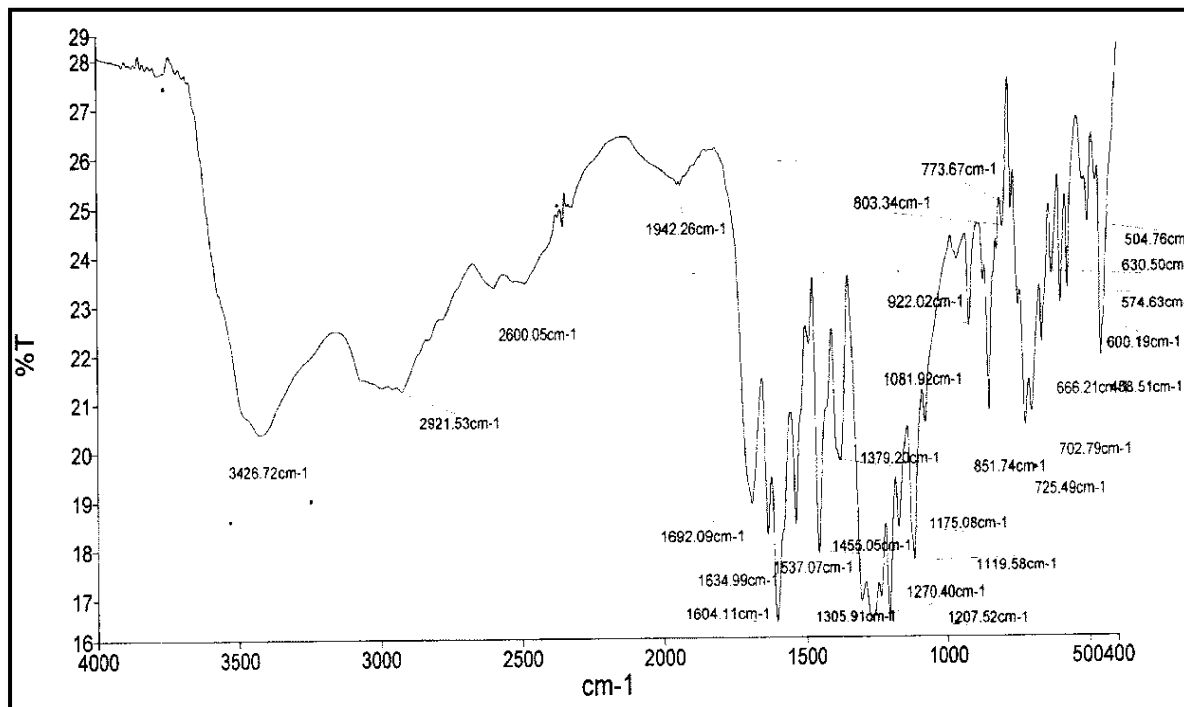

Figure S4: Mass spectrum of FLH:

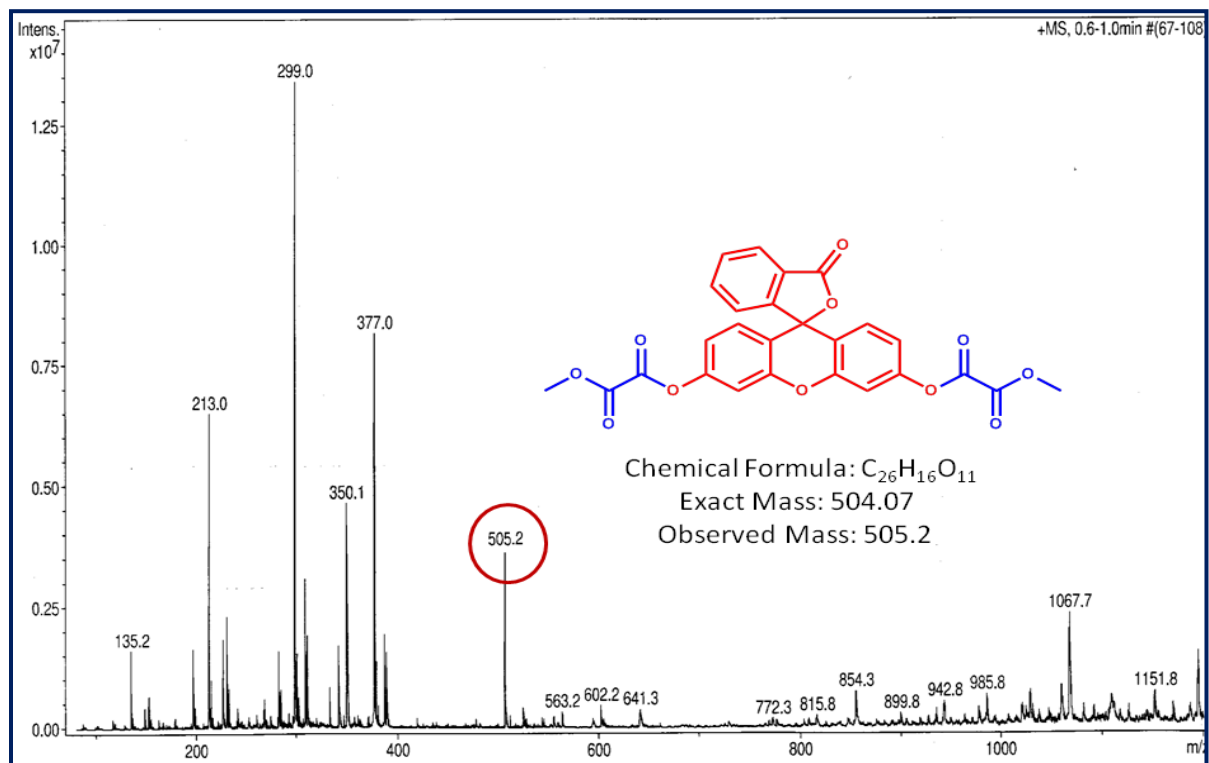



Figure S5:  $^1\text{H}$  NMR spectrum of FLHP (in  $\text{DMSO}-d_6$ ):

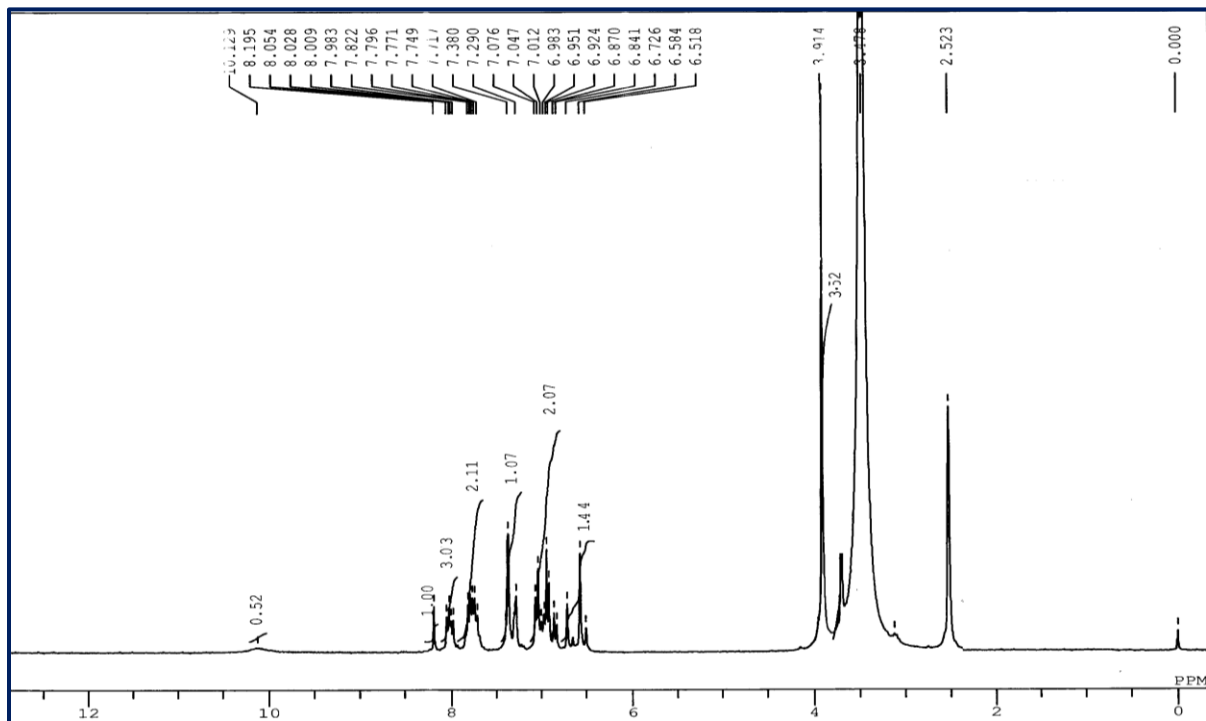

**Figure S6:**  $^{13}\text{C}$  NMR spectrum of **FLHP** (in  $\text{DMSO-}d_6$ ):

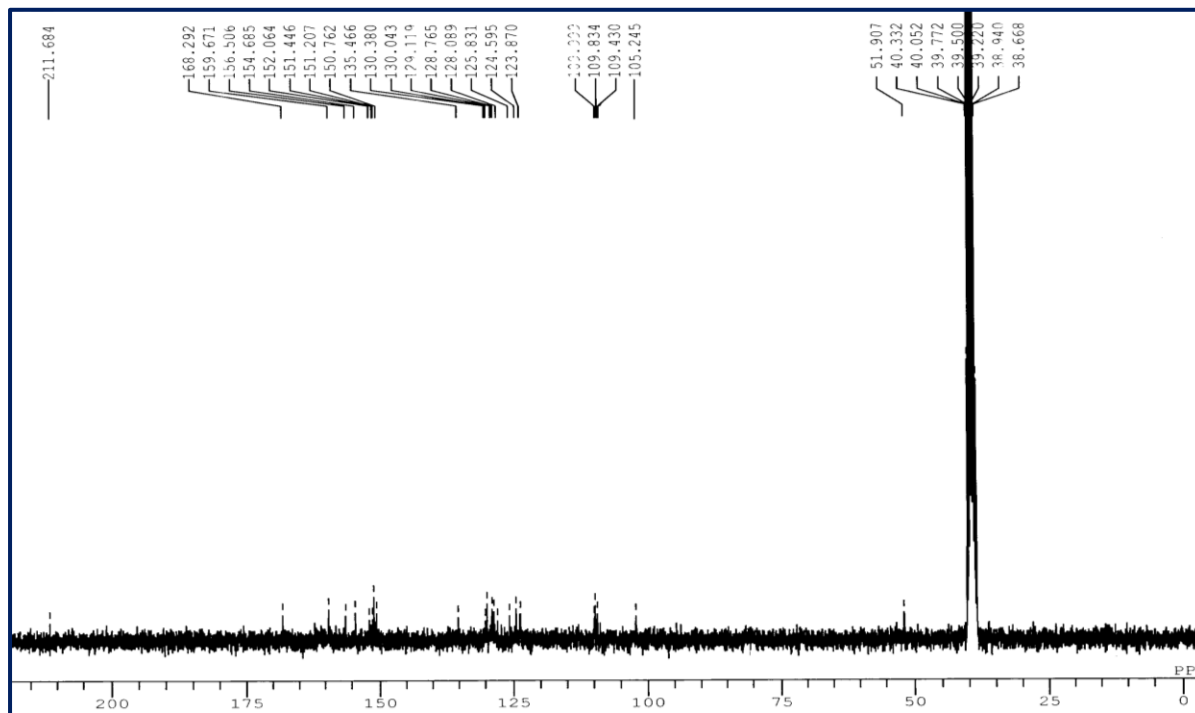

Figure S7: IR spectrum of FLHP:

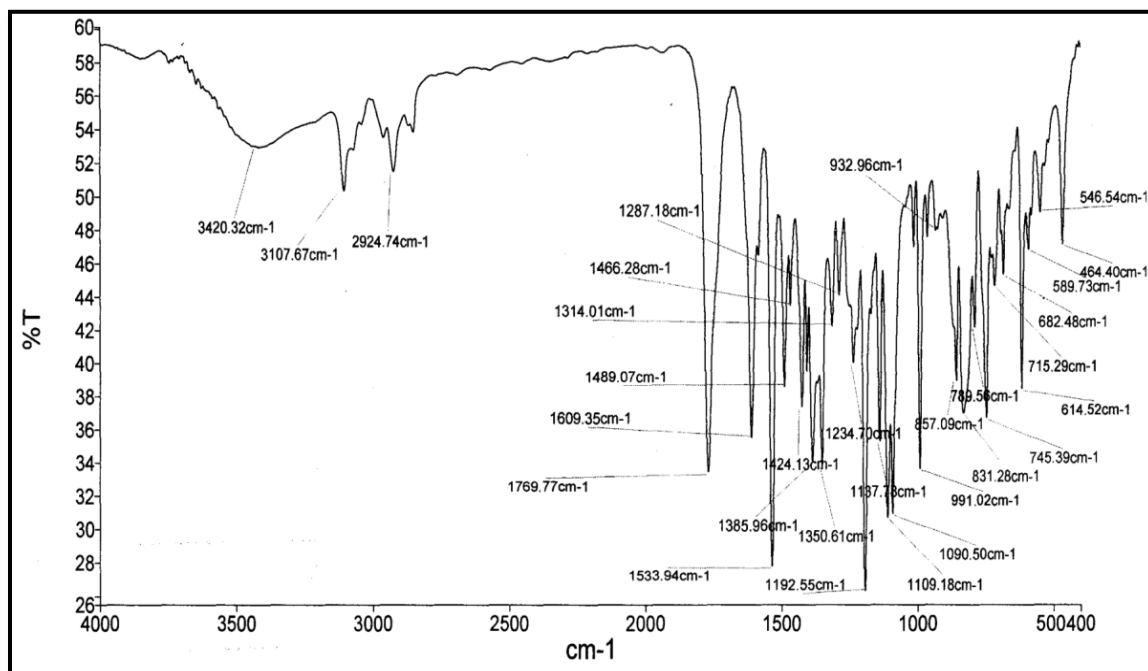

**Figure S8:** Mass spectrum of **FLHP**:

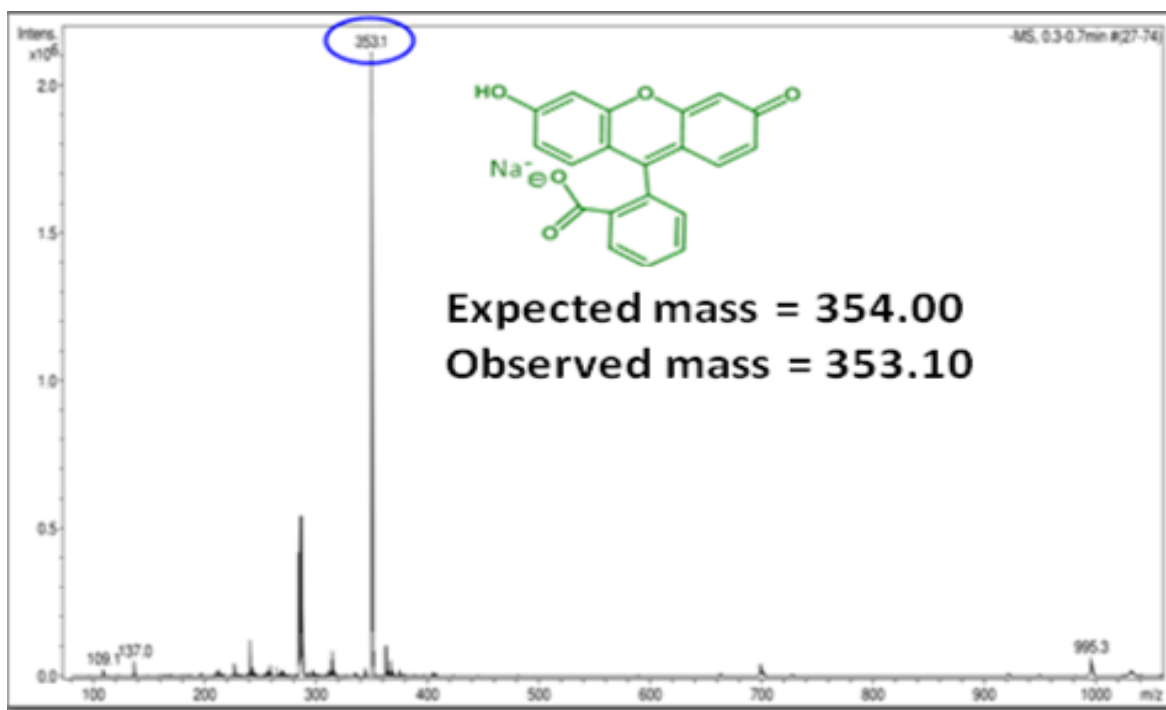

**Figure S9:** UV-visible spectra of **FLH** with different anions at 10 $\mu$ M in EtOH: water (3: 2, v/v) medium:

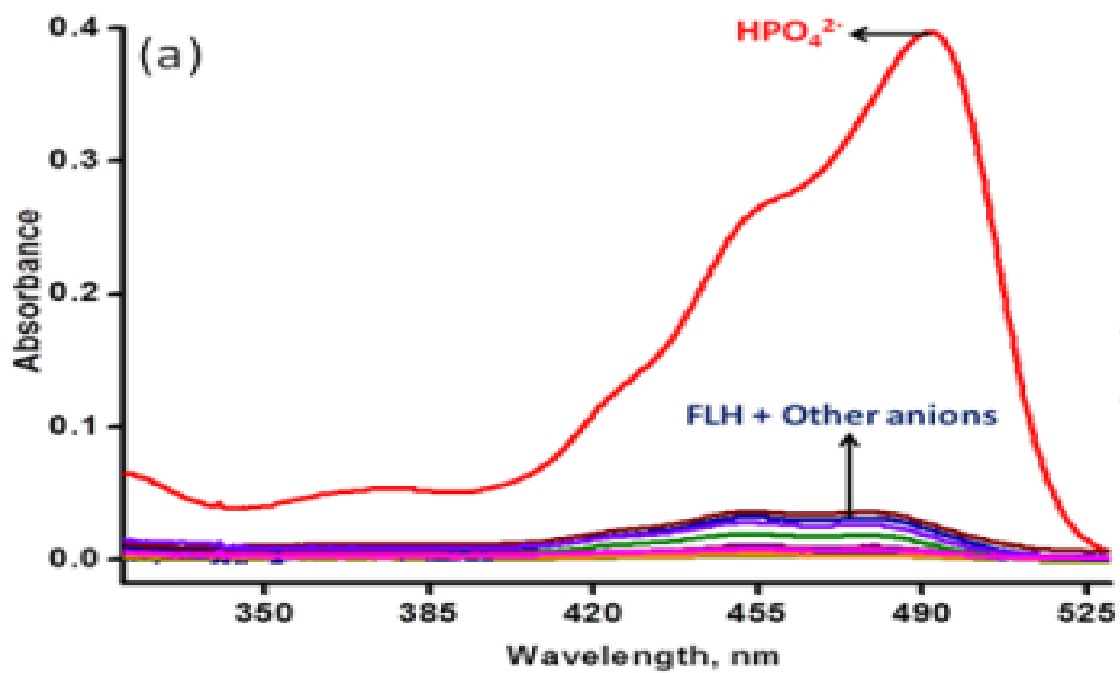

**Figure S10:** Bar graph representation of Absorption spectrum for competition study; [yellow bars] showing response **FLH** in presence of various anions, [blue bars] showing response of **FLH** in presence of  $\text{HPO}_4^{2-}$  and  $\text{HPO}_4^{2-}$  followed by various competing anions:

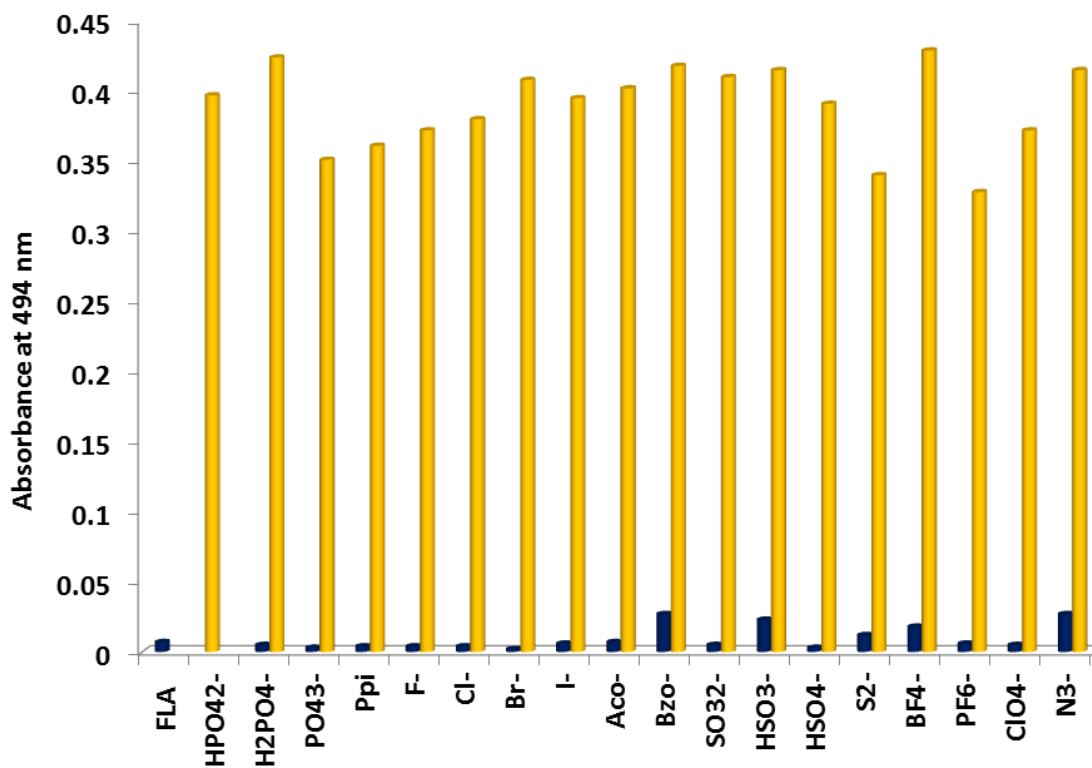

**Figure S11:** Naked-eye images of **FLH** in the presence of  $\text{HPO}_4^{2-}$  and various anions (under visible light):

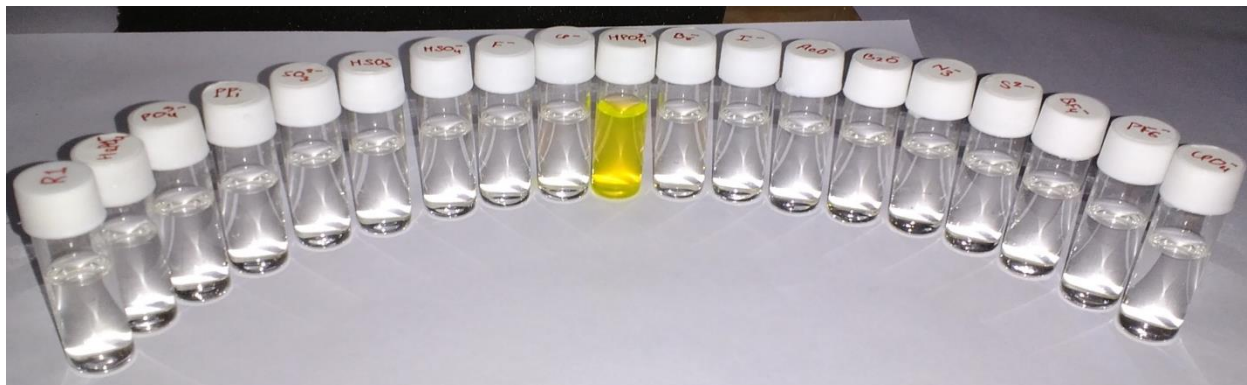

**Figure S12:** Naked eye fluorescence images of **FLH** (1.0 $\mu$ M) in the presence of  $\text{HPO}_4^{2-}$  and various anions (10 equiv.):

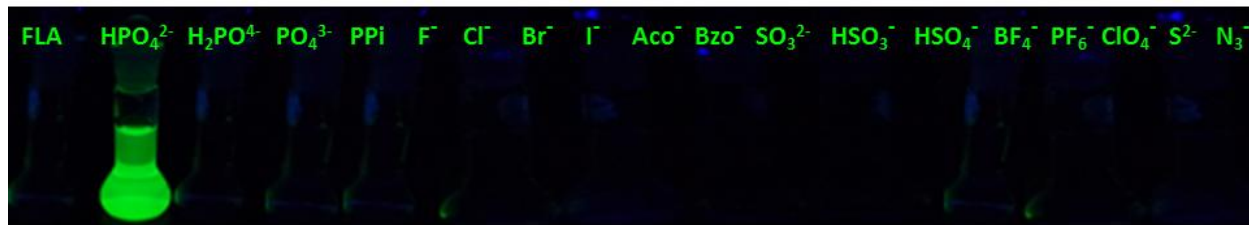



**Figure S13:** Fluorescence spectra of receptor **FLH** (1.0 $\mu$ M) upon addition of different anions:

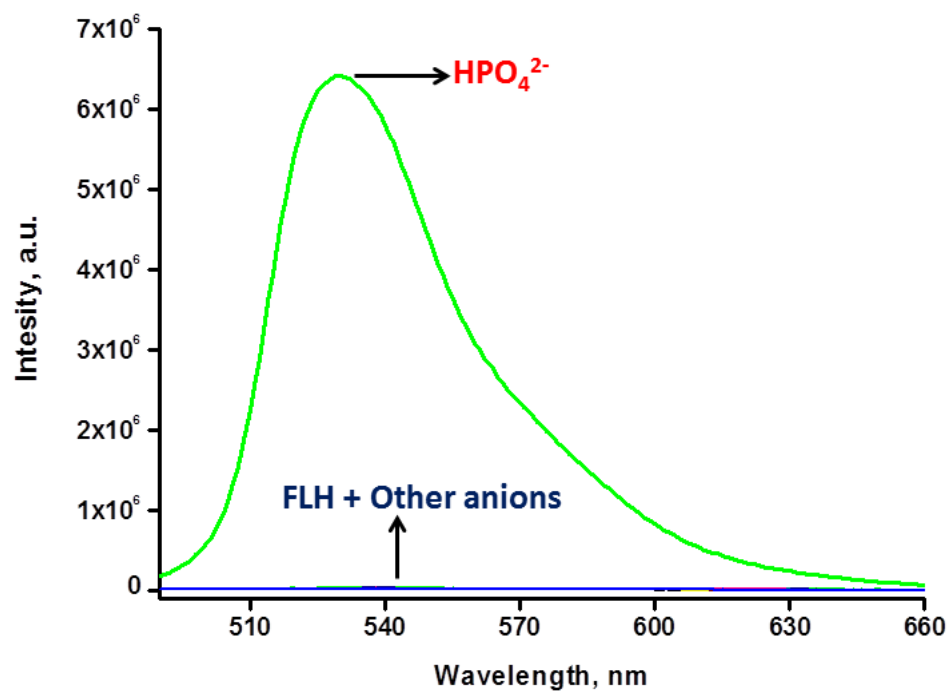

**Figure S14:** Bar graph representation of emission spectrum for competition study; [green bars] showing response **FLH** in presence of various anions, [red bars] showing response of **FLH** in presence of  $\text{HPO}_4^{2-}$  and  $\text{HPO}_4^{2-}$  followed by various competing anions:

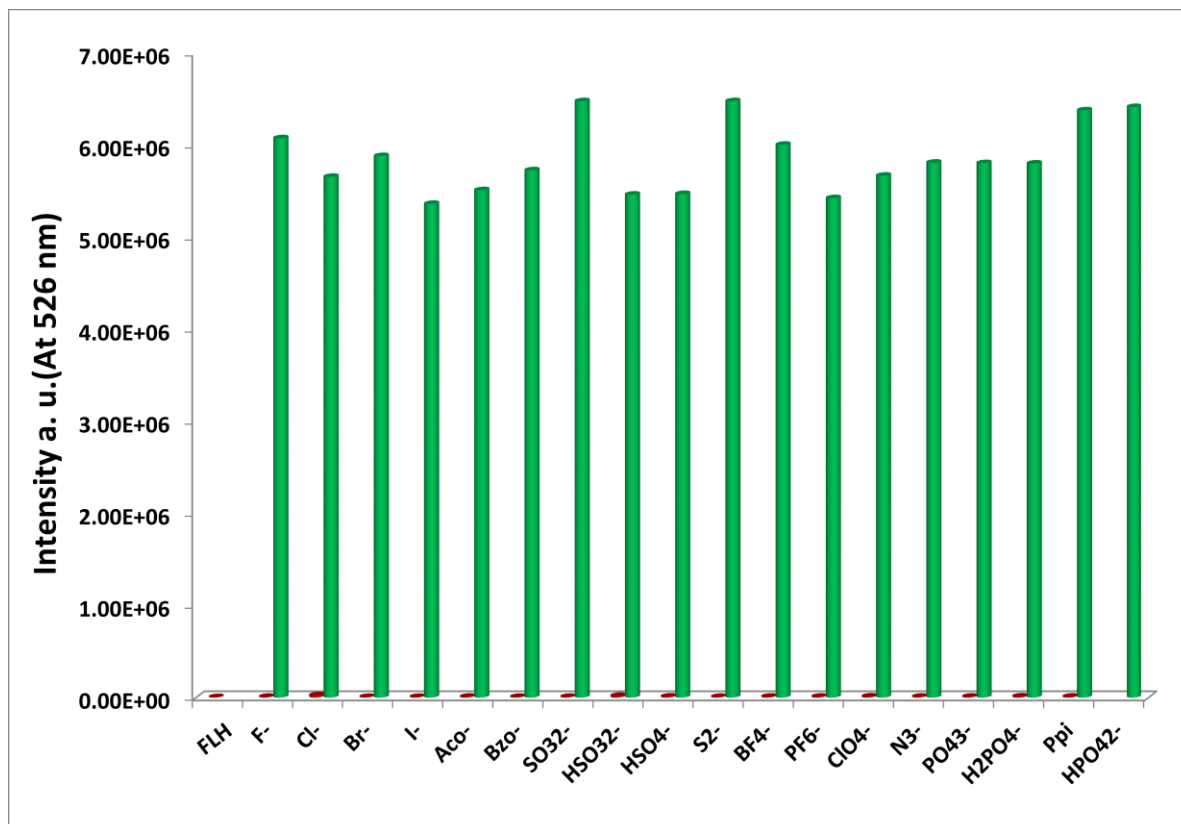

**Figure S15:** Calibration curve for determination of detection limit of **FLH** for  $\text{HPO}_4^{2-}$  by using absorption titration data (494 nm):

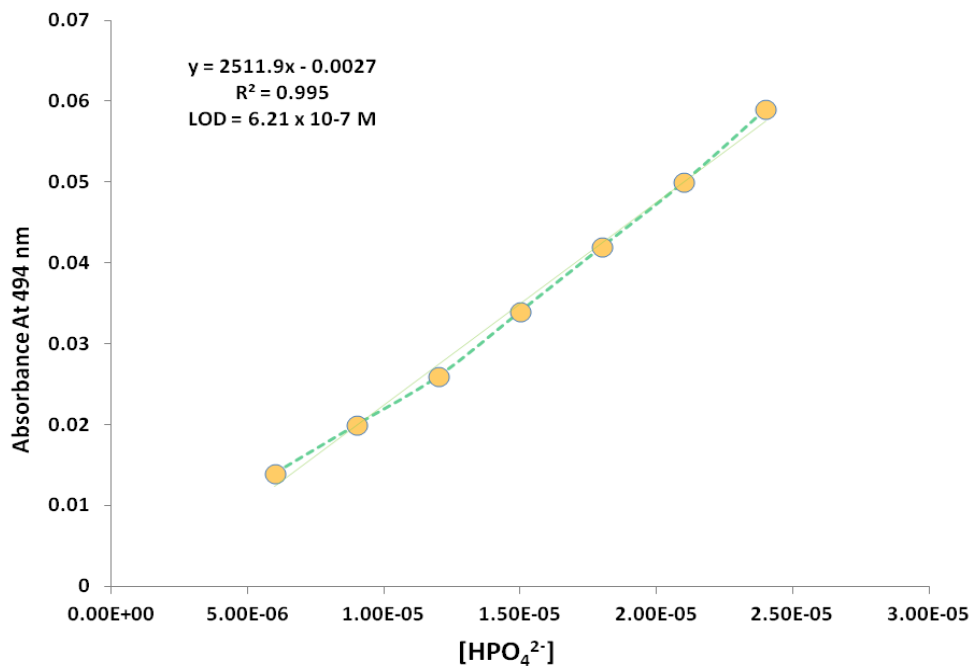

**Figure S16:** Calibration curve for determination of detection limit of **FLH** for  $\text{HPO}_4^{2-}$  by using emission titration data (526 nm):

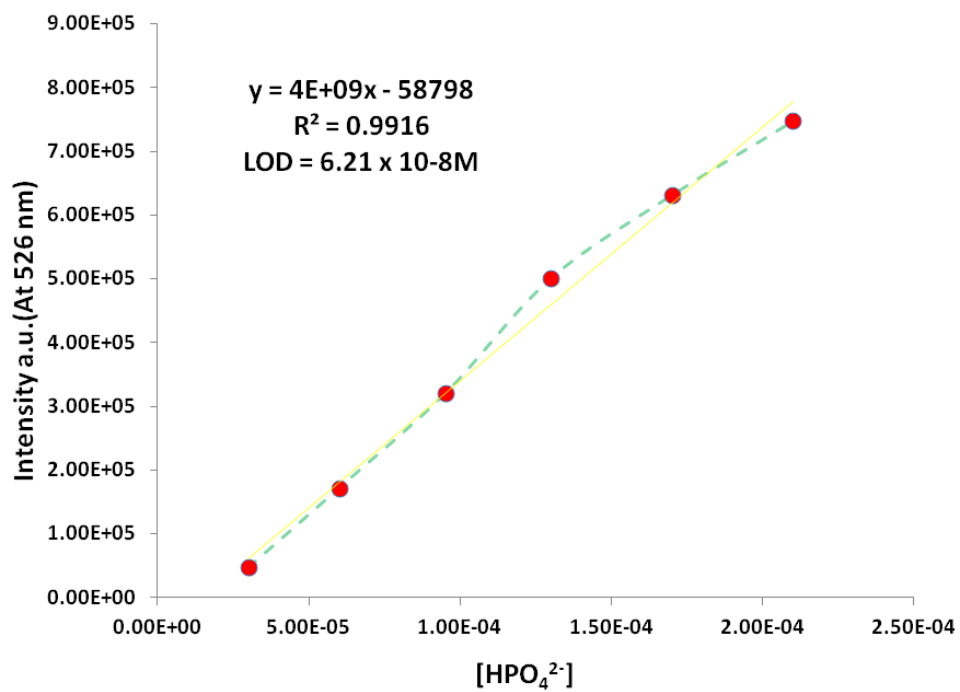

**Figure S17:** Fluorescence spectra of receptor **FLH** (1.0 $\mu$ M) upon addition different anions and corresponding fluorescence images

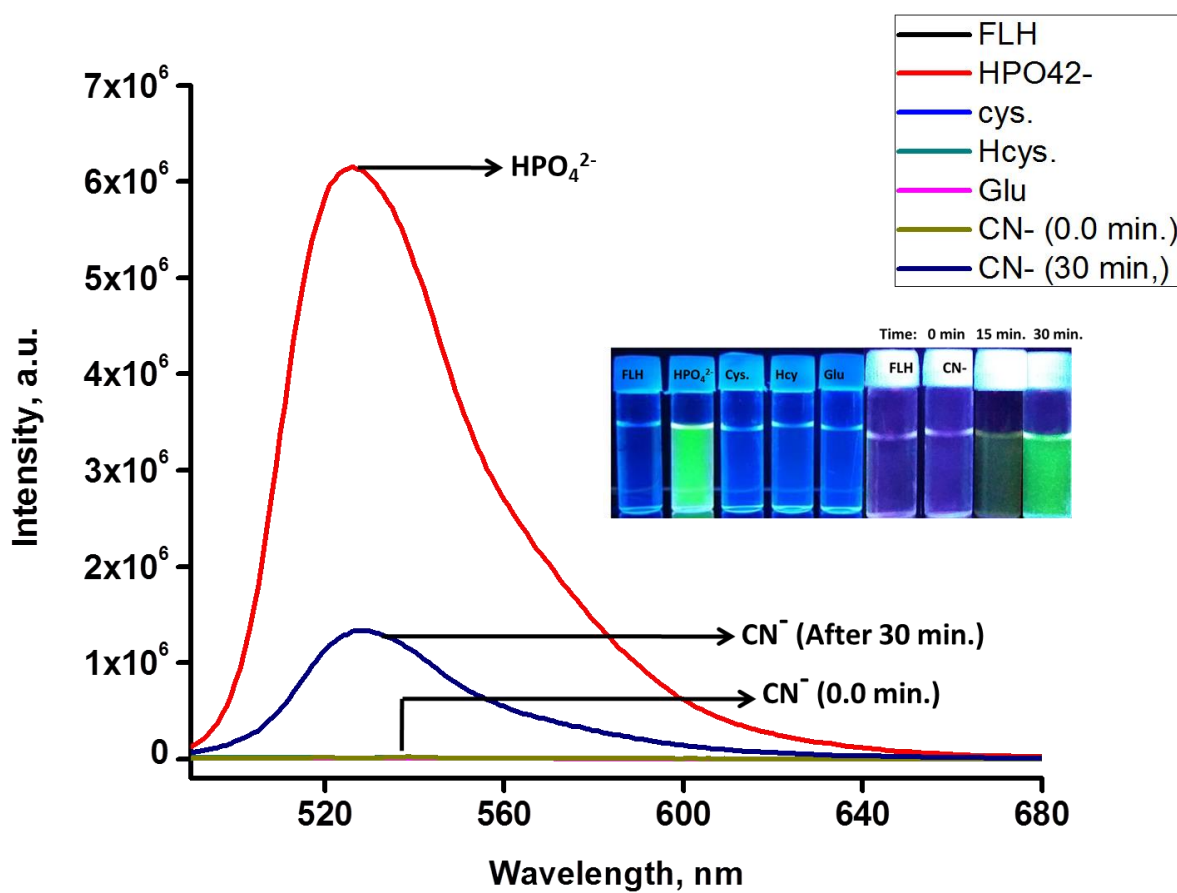

**Figure S18:** Reaction time profile of **FLH** with  $\text{HPO}_4^{2-}$  by (a) Through UV-visible spectra ( $\lambda_{\text{abs}}$  at 495 nm) and (b) Fluorescence spectra  $\lambda_{\text{em}}$  at 530 nm.

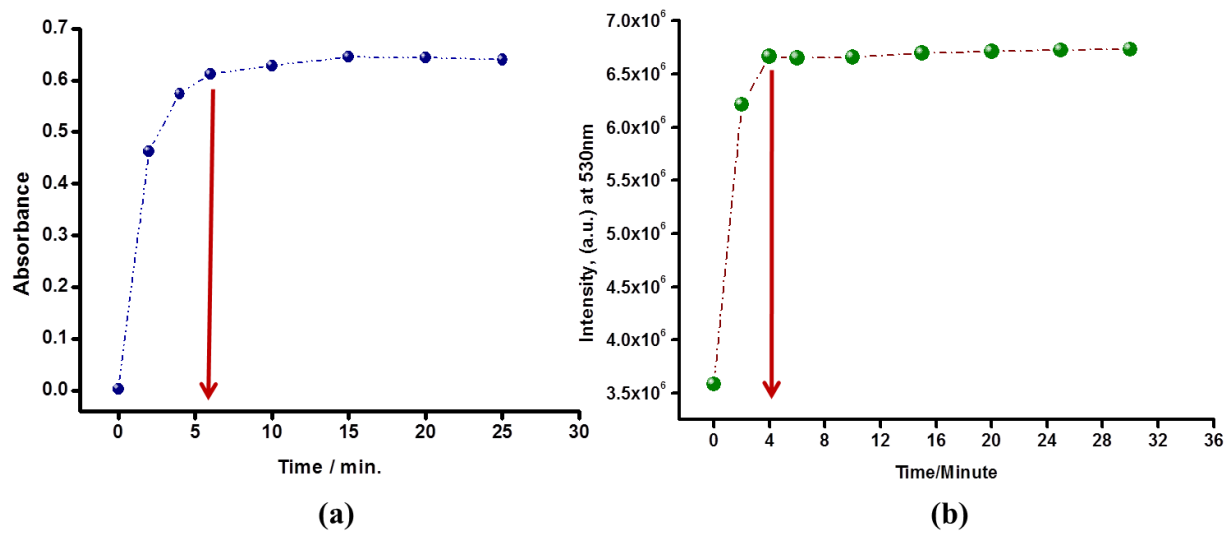

**Figure S19:** The variation in fluorescence intensity in **FLH** with the change in pH in the presence of  $\text{HPO}_4^{2-}$ :

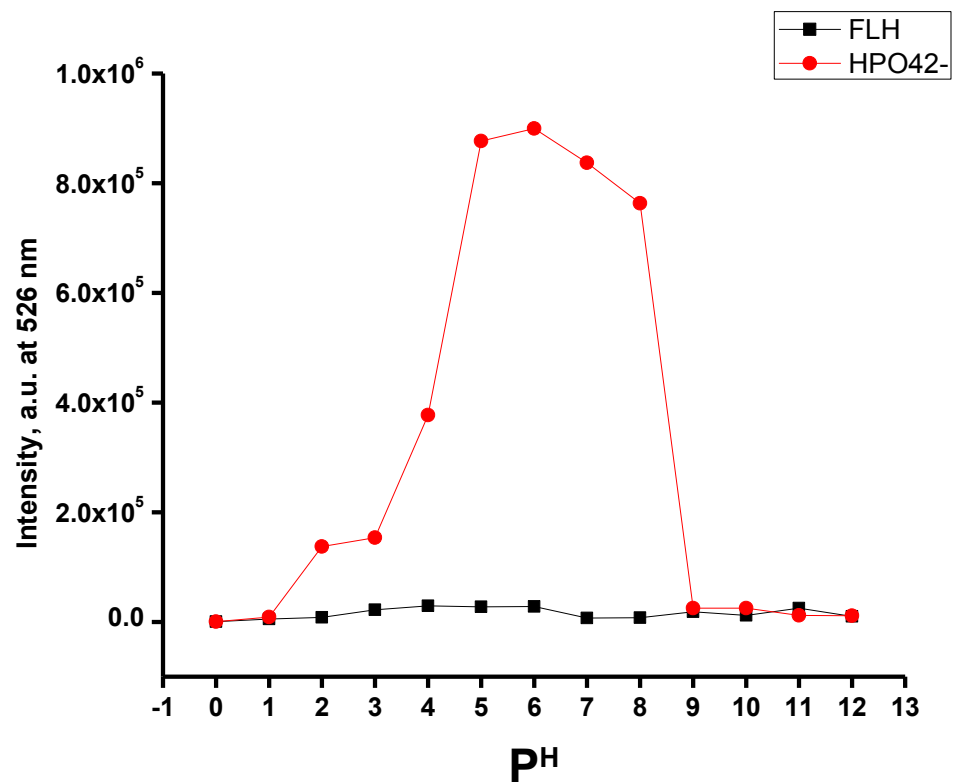

**TABLE S1:** Crystal data of **FLHP**

| <b>Identification code</b>        | <b>FLHP</b>                                                                                                                               |
|-----------------------------------|-------------------------------------------------------------------------------------------------------------------------------------------|
| CCDC number                       | <b>994988</b>                                                                                                                             |
| Empirical formula                 | $C_{20}H_{14}O_6$                                                                                                                         |
| Formula weight                    | 350.31                                                                                                                                    |
| Temperature                       | 293(2) K                                                                                                                                  |
| Wavelength                        | 0.71073 Å                                                                                                                                 |
| Crystal system, space group       | Triclinic, P -1                                                                                                                           |
| Unit cell dimensions              | a = 8.1166(11) Å    alpha = 70.890(10) deg.<br>b = 9.7387(12) Å    beta = 69.248(11) deg.<br>c = 11.3513(12) Å    gamma = 77.970(11) deg. |
| Volume                            | 788.47(17) Å <sup>3</sup>                                                                                                                 |
| Absorption coefficient            | 0.110 mm <sup>-1</sup>                                                                                                                    |
| F(000)                            | 364.0                                                                                                                                     |
| Crystal size                      | 0.24 x 0.20 x 0.18 mm                                                                                                                     |
| Theta range for data collection   | 3.31 to 29.02 deg.                                                                                                                        |
| Limiting indices                  | -10<=h<=9, -11<=k<=12, -12<=l<=14                                                                                                         |
| Reflections collected / unique    | 6075 / 3557 [R(int) = 0.0390]                                                                                                             |
| Completeness to theta = 25.00     | 99.8 %                                                                                                                                    |
| Refinement method                 | Full-matrix least-squares on F <sup>2</sup>                                                                                               |
| Data / restraints / parameters    | 3557 / 0 / 240                                                                                                                            |
| Goodness-of-fit on F <sup>2</sup> | 1.007                                                                                                                                     |
| Final R indices [I>2sigma(I)]     | R1 = 0.0723, wR2 = 0.1541                                                                                                                 |
| R indices (all data)              | R1 = 0.1596, wR2 = 0.2106                                                                                                                 |
| Largest diff. peak and hole       | 0.277 and -0.285 e.Å <sup>-3</sup>                                                                                                        |
